# Supplementary material for: Gender differences in endocrine-immune interactions in response to acute resistance exercise
Source: PeerJ journal article supplement (doi:10.7717/peerj.11166), 2009-01-01

subcluster\_1\_log2\_medianCentered\_fpkm.matrix, 10114 trans

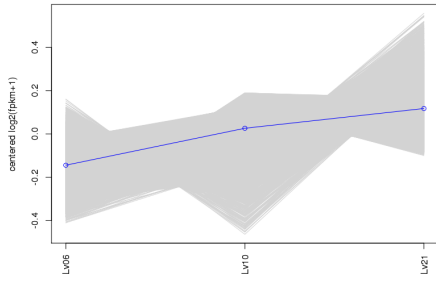

subcluster\_2\_log2\_medianCentered\_fpkm.matrix, 867 trans

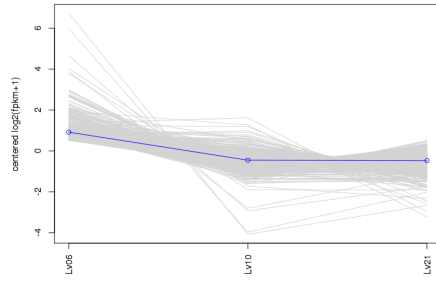

subcluster\_3\_log2\_medianCentered\_fpkm.matrix, 1242 trans

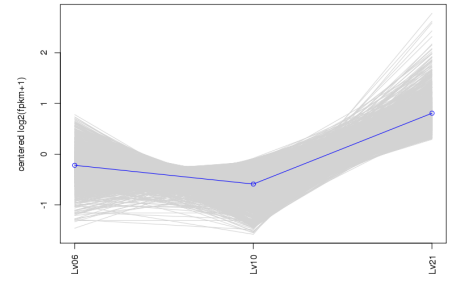

subcluster\_4\_log2\_medianCentered\_fpkm.matrix, 2391 trans

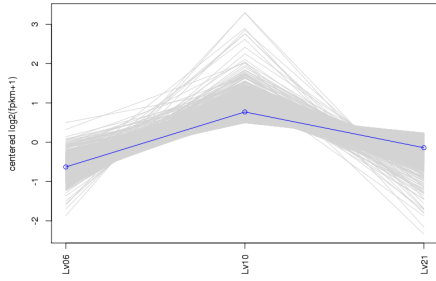

subcluster\_5\_log2\_medianCentered\_fpkm.matrix, 10253 trans

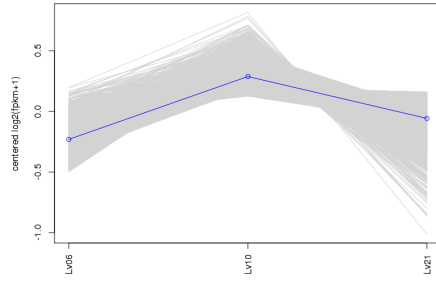

subcluster\_6\_log2\_medianCentered\_fpkm.matrix, 6909 trans

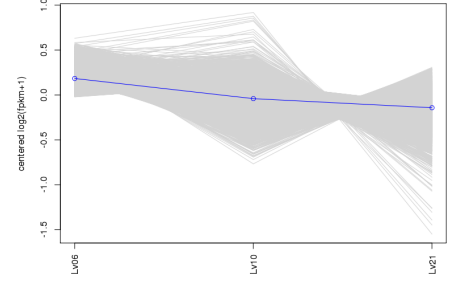

subcluster\_7\_log2\_medianCentered\_fpkm.matrix, 1073 trans

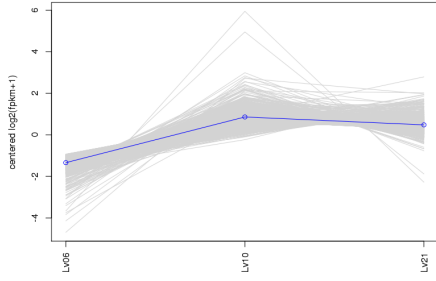

subcluster\_8\_log2\_medianCentered\_fpkm.matrix, 6092 trans

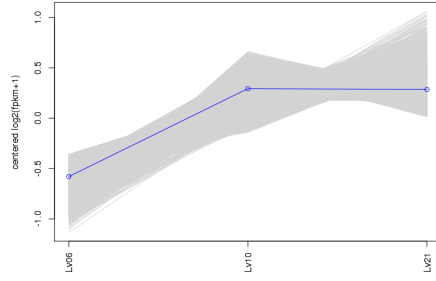

subcluster\_9\_log2\_medianCentered\_fpkm.matrix, 498 trans

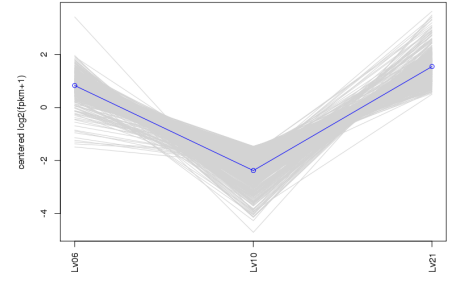

Supplement: FigS6.pdf [file FigS6.pdf]
