# Supplementary material for: Gender differences in endocrine-immune interactions in response to acute resistance exercise
Source: PeerJ journal article supplement (doi:10.7717/peerj.11166), 2009-01-01

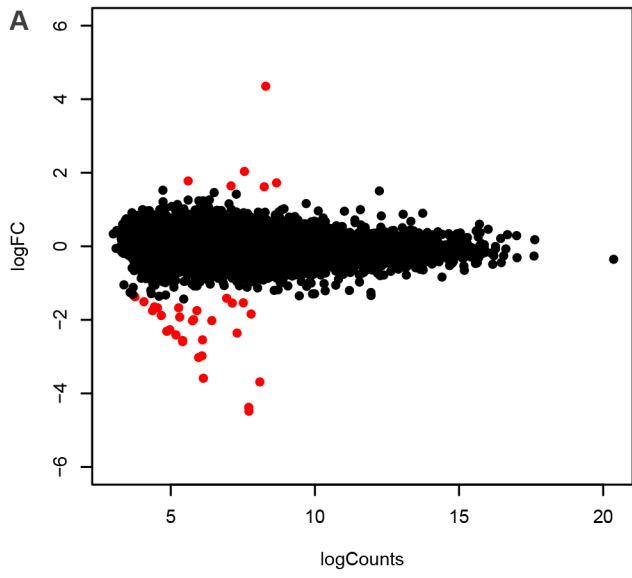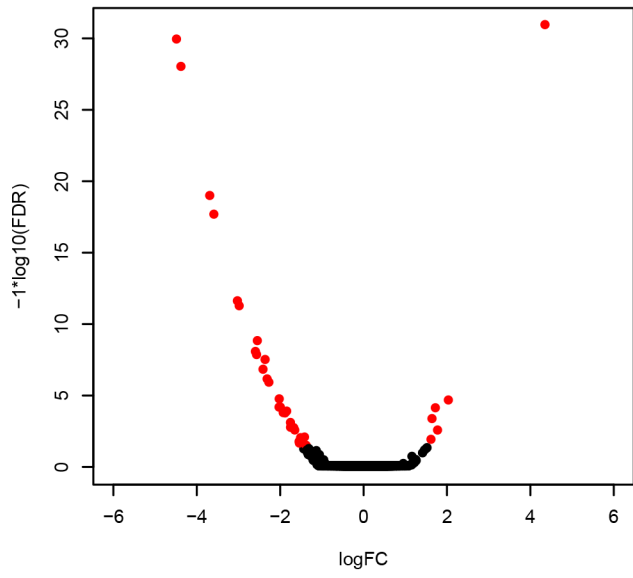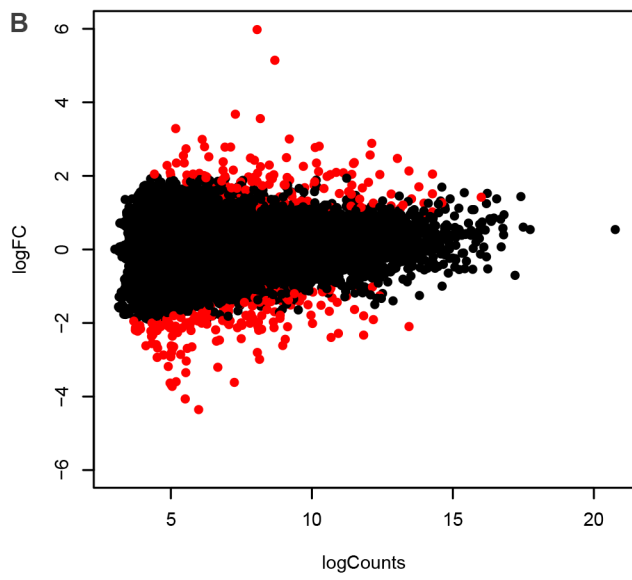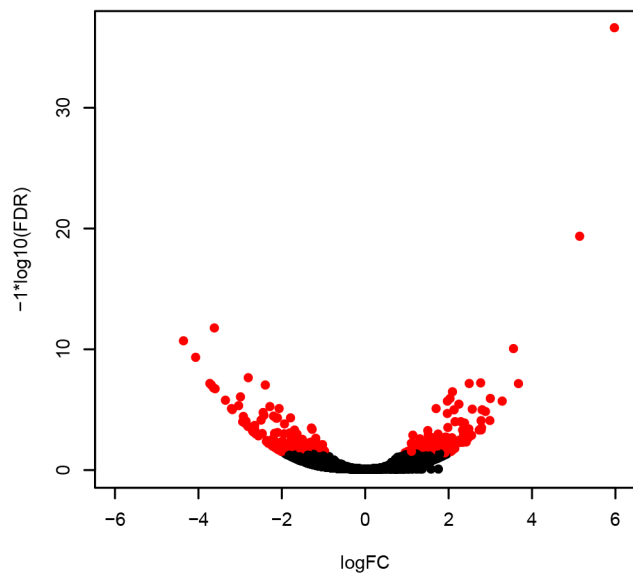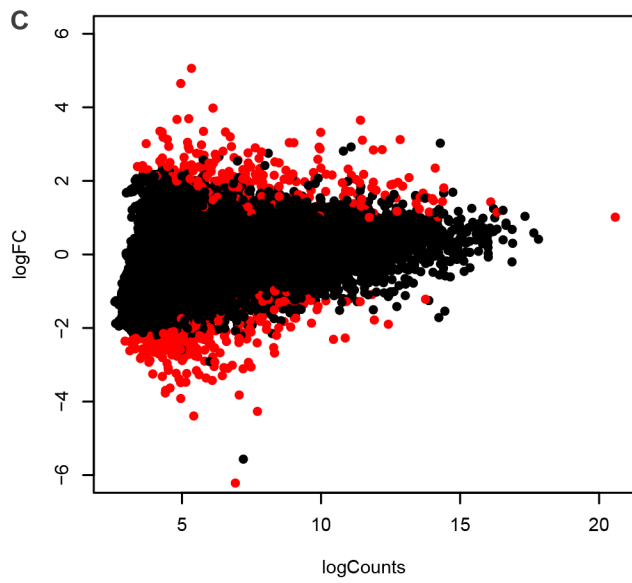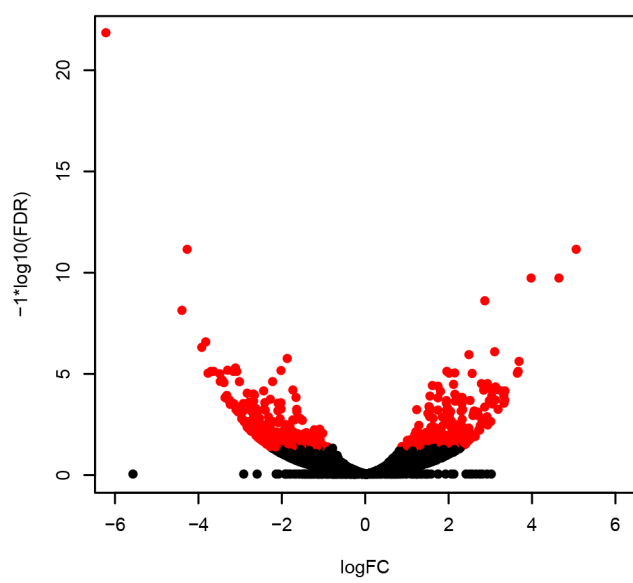

Supplement: FigS8.pdf [file FigS8.pdf]
