# Supplementary material for: Transcriptome analysis of the liver of Eospalax fontanierii under hypoxia
Source: PeerJ. 2021 Apr 22;9:e11166. doi: 10.7717/peerj.11166 (PMC8071069; doi:10.7717/peerj.11166)
Supplement: Table S7 [file peerj-09-11166-s005.xlsx]

## Sheet: Sheet1
TableS7	Raw data for Figure 5 (Note: En represents normoxia, Ec represent chronic hypoxia, and Ea represents acute hypoxia)
MT_QPRC	Fig5_A	actin CT	MT CT	△Ct		△△Ct	2^(-△△Ct)
0.21	En3L	25.556	22.954	-2.602	-2.909	0.307	0.808321
	En3L	25.936	22.691	-3.245		-0.336	1.26225
	En3L	25.584	22.704	-2.88		0.029	0.980099
	En4L	23.664	25.643	1.979		4.888	0.0337727
	En4L	23.732	25.541	1.809		4.718	0.0379962
	En4L	23.72	25.541	1.821		4.73	0.0376815
	En4L	23.682	25.54	1.858		4.767	0.0367274
	En4L	23.7	25.538	1.838		4.747	0.0372401
	En4L	23.63	25.542	1.912		4.821	0.0353781
0.105	Ec1L	24.982	30.094	5.112		8.021	0.0038498
	Ec1L	25.1	30.059	4.959		7.868	0.00428051
	Ec1L	24.918	29.897	4.979		7.888	0.00422158
	Ec2L	25.829	26.873	1.044		3.953	0.0645696
	Ec2L	25.851	26.29	0.439		3.348	0.0982091
	Ec2L	26.005	26.185	0.18		3.089	0.117522
	Ec3L	25.21	26.927	1.717		4.626	0.0404982
	Ec3L	25.168	26.802	1.634		4.543	0.0428964
	Ec3L	25.048	26.965	1.917		4.826	0.0352557
0.065	Ea2L	24.488	21.356	-3.132		-0.223	1.16716
	Ea2L	24.497	21.415	-3.082		-0.173	1.1274
	Ea2L	24.314	21.142	-3.172		-0.263	1.19997
	Ea3L	24.673	21.866	-2.807		0.102	0.93174
	Ea3L	24.834	21.94	-2.894		0.015	0.989657
	Ea3L	24.692	22.532	-2.16		0.749	0.595016
	Ea4L	22.855	22.103	-0.752		2.157	0.224222
	Ea4L	22.824	21.851	-0.973		1.936	0.26134
	Ea4L	22.949	21.968	-0.981		1.928	0.262793
	Cpt1a_QPRC:
	Fig5_B	actin CT	Cpt1a CT	△Ct		△△Ct	2^(-△△Ct)
0.21	En3L	23.763	24.93	1.167	1.01921	0.147791	0.902631
	En3L	24.084	25.039	0.955		-0.0642087	1.04551
	En3L	23.9234	24.859	0.935626		-0.0835827	1.05965
	En4L	22.506	25.011	2.505		1.48579	0.357053
	En4L	22.923	25.235	2.312		1.29279	0.408161
	En4L	23.47	25.107	1.637		0.617791	0.651668
0.105	Ec1L	24.258	31.689	7.431		6.41179	0.0117451
	Ec1L	24.303	31.305	7.002		5.98279	0.0158125
	Ec1L	24.2806	31.297	7.01643		5.99722	0.0156551
	Ec2L	24.985	25.149	0.164		-0.855209	1.80902
	Ec2L	25.332	25.335	0.003		-1.01621	2.0226
	Ec2L	25.1582	25.406	0.247755		-0.771454	1.70699
	Ec3L	23.866	24.832	0.966		-0.0532087	1.03757
	Ec3L	24.602	24.375	-0.227		-1.24621	2.37217
	Ec3L	24.542	24.623	0.081		-0.938209	1.91615
0.065	Ea2L	23.364	22.748	-0.616		-1.63521	3.10632
	Ea2L	23.861	23.173	-0.688		-1.70721	3.26528
	Ea2L	24.018	22.935	-1.083		-2.10221	4.29366
	Ea3L	23.219	23.751	0.532		-0.487209	1.40173
	Ea3L	23.929	23.884	-0.045		-1.06421	2.09102
	Ea3L	24.181	24.119	-0.062		-1.08121	2.11581
	Ea4L	22.653	23.472	0.819		-0.200209	1.14886
	Ea4L	22.64	23.335	0.695		-0.324209	1.25198
	Ea4L	22.6464	23.564	0.917607		-0.101602	1.07296
	Slc27a2_Qpcr:
	Fig5_C	actin CT	Slc27a2 CT	△Ct		△△Ct	2^(-△△Ct)
0.21	En3L	25.27	25.66	0.39	0.663333	-0.273333	1.2086
	En3L	25.13	25.81	0.68		0.0166667	0.988514
	En3L	25.13	26.05	0.92		0.256667	0.83702
	En4L	24.14	24.73	0.59		-0.0733333	1.05214
	En4L	24.09	24.93	0.84		0.176667	0.884745
	En4L	24.05	24.71	0.66		-0.00333333	1.00231
0.105	Ec2L	26.45	25.29	-1.16		-1.82333	3.53898
	Ec2L	26.47	25.22	-1.25		-1.91333	3.76678
	Ec2L	26.36	25.3	-1.06		-1.72333	3.30198
	Ec3L	25.68	24.44	-1.24		-1.90333	3.74076
	Ec3L	25.67	24.42	-1.25		-1.91333	3.76678
	Ec3L	25.64	24.41	-1.23		-1.89333	3.71493
0.065	Ea2L	24.38	23.09	-1.29		-1.95333	3.87268
	Ea2L	25.06	23.04	-2.02		-2.68333	6.42338
	Ea2L	24.54	23.03	-1.51		-2.17333	4.51064
	Ea3L	26.73	24.09	-2.64		-3.30333	9.87194
	Ea3L	24.95	24.56	-0.39		-1.05333	2.07532
	Ea3L	24.85	24.35	-0.5		-1.16333	2.23974
	Ea4L	23.91	23.33	-0.58		-1.24333	2.36745
	Ea4L	24.49	23.41	-1.08		-1.74333	3.34808
	Ea4L	23.46	23.37	-0.09		-0.753333	1.68568
	C4bpb_Qpcr
	Fig5D	actin CT	C4bpb CT	△Ct		△△Ct	2^(-△△Ct)
0.21	En3L	23.69	26.538	2.848	2.65055	0.197454	0.872088
	En3L	24.495	26.815	2.32		-0.330546	1.25749
	En3L	24.0924	26.876	2.78364		0.133091	0.911875
	En4L	22.923	27.752	4.829		2.17845	0.220912
	En4L	23.104	26.942	3.838		1.18745	0.439077
	En4L	23.0136	26.924	3.9104		1.25986	0.417585
0.105	Ec1L	24.938	29.595	4.657		2.00645	0.248884
	Ec1L	25.339	29.77	4.431		1.78045	0.291092
	Ec1L	25.1385	29.485	4.34651		1.69597	0.308648
	Ec2L	26.018	27.039	1.021		-1.62955	3.09416
	Ec2L	26.294	26.994	0.7		-1.95055	3.86521
	Ec2L	26.1559	27.346	1.19012		-1.46043	2.7519
	Ec3L	25.113	25.439	0.326		-2.32455	5.00908
	Ec3L	25.439	25.808	0.369		-2.28155	4.86199
	Ec3L	25.2763	25.558	0.281701		-2.36884	5.16527
0.065	Ea2L	24.415	24.577	0.162		-2.48855	5.61212
	Ea2L	24.399	24.732	0.333		-2.31755	4.98483
	Ea2L	24.4067	24.823	0.41628		-2.23427	4.70523
	Ea3L	24.708	25.748	1.04		-1.61055	3.05367
	Ea3L	25.167	25.917	0.75		-1.90055	3.73354
	Ea3L	24.9378	25.907	0.969199		-1.68135	3.20727
	Ea4L	23.064	24.626	1.562		-1.08855	2.1266
	Ea4L	23.344	23.861	0.517		-2.13355	4.38795
	Ea4L	23.2044	24.686	1.48159		-1.16895	2.24848
	Hyal2_Qpcr
	Fig5E	actin CT	Hyal2 CT	△Ct		△△Ct	2^(-△△Ct)
0.21	En3L	25.21	31.8	6.59	6.59667	-0.00666667	1.00463
	En3L	25.74	32.24	6.5		-0.0966667	1.0693
	En3L	25.33	32.03	6.7		0.103333	0.93088
	En4L	24.19	29.58	5.39		-1.20667	2.30804
	En4L	24.11	29.43	5.32		-1.27667	2.42279
	En4L	24.05	29.64	5.59		-1.00667	2.00926
0.105	Ec1L	25.08	29.94	4.86		-1.73667	3.33264
	Ec1L	25.15	29.96	4.81		-1.78667	3.45017
	Ec2L	26.51	30.47	3.96		-2.63667	6.21893
	Ec2L	26.69	30.33	3.64		-2.95667	7.76328
	Ec2L	26.55	30.35	3.8		-2.79667	6.94833
	Ec3L	25.45	29.95	4.5		-2.09667	4.2772
	Ec3L	25.43	29.81	4.38		-2.21667	4.64818
	Ec3L	25.6	29.85	4.25		-2.34667	5.08648
0.065	Ea2L	24.41	27.54	3.13		-3.46667	11.0553
	Ea2L	24.4	27.61	3.21		-3.38667	10.459
	Ea2L	24.46	27.53	3.07		-3.52667	11.5248
	Ea3L	24.82	28.87	4.05		-2.54667	5.84283
	Ea3L	25.48	28.5	3.02		-3.57667	11.9312
	Ea3L	24.74	28.45	3.71		-2.88667	7.3956
	Ea4L	23.84	28.68	4.84		-1.75667	3.37916
	Ea4L	23.75	28.71	4.96		-1.63667	3.10947
	Ea4L	23.81	28.57	4.76		-1.83667	3.57184
	Cpt7A1_Qpcr
	Fig5F	actin CT	Cyp7a1 CT	△Ct		△△Ct	2^(-△△Ct)
0.21	En3L	24.58	25.14	0.56	0.313333	0.246667	0.842842
	En3L	25.13	25.02	-0.11		-0.423333	1.34102
	En3L	24.82	25.31	0.49		0.176667	0.884745
	En3L	25.97	25.76	-0.21		-0.523333	1.43727
	En3L	26.04	25.97	-0.07		-0.383333	1.30435
	En3L	25.84	26.03	0.19		-0.123333	1.08925
	En4L	24.79	27.56	2.77		2.45667	0.182167
	En4L	25.02	27.4	2.38		2.06667	0.23871
	En4L	24.8	27.39	2.59		2.27667	0.206374
	En4L	22.79	26.34	3.55		3.23667	0.106088
	En4L	23.42	26.22	2.8		2.48667	0.178418
	En4L	23.26	26.41	3.15		2.83667	0.139984
0.105	Ec1L	26.01	34.45	8.44		8.12667	0.00357791
	Ec1L	24.08	33.14	9.06		8.74667	0.00232804
	Ec1L	24.22	33.01	8.79		8.47667	0.00280717
	Ec1L	24.36	33.76	9.4		9.08667	0.00183925
	Ec2L	26.81	29.05	2.24		1.92667	0.263036
	Ec2L	26.75	29.93	3.18		2.86667	0.137103
	Ec2L	25.95	28.69	2.74		2.42667	0.185995
	Ec2L	25.95	28.73	2.78		2.46667	0.180909
	Ec2L	26.66	28.87	2.21		1.89667	0.268563
	Ec3L	26.08	27.3	1.22		0.906667	0.533416
	Ec3L	25.84	27.61	1.77		1.45667	0.364334
	Ec3L	26.47	27.64	1.17		0.856667	0.552227
	Ec3L	24.35	26.53	2.18		1.86667	0.274206
	Ec3L	25.03	26.94	1.91		1.59667	0.33064
	Ec3L	25.86	26.7	0.84		0.526667	0.694157
0.065	Ea2L	25.15	25.29	0.14		-0.173333	1.12766
	Ea2L	25.16	25.58	0.42		0.106667	0.928731
	Ea2L	25.1	25.33	0.23		-0.0833333	1.05946
	Ea2L	24.16	24.63	0.47		0.156667	0.897095
	Ea2L	24.09	24.74	0.65		0.336667	0.791869
	Ea2L	23.92	24.75	0.83		0.516667	0.698985
	Ea3L	25.21	25.28	0.07		-0.243333	1.18372
	Ea3L	26.03	25.52	-0.51		-0.823333	1.76949
	Ea3L	25.38	25.49	0.11		-0.203333	1.15136
	Ea3L	23.65	24.28	0.63		0.316667	0.802923
	Ea3L	23.69	24.47	0.78		0.466667	0.723635
	Ea3L	24	24.59	0.59		0.276667	0.825496
	Ea4L	24.28	22.89	-1.39		-1.70333	3.25653
	Ea4L	24.2	23.23	-0.97		-1.28333	2.43401
	Ea4L	24.3	23.35	-0.95		-1.26333	2.4005
	Ea4L	23.28	22.35	-0.93		-1.24333	2.36745
	Ea4L	23.37	22.38	-0.99		-1.30333	2.46798
	Ea4L	23.62	22.45	-1.17		-1.48333	2.79594
